# Supplementary material for: Evaluation of Changes Over Time in the Drug Burden and Medication Regimen Complexity in ESRD Patients Before and After Renal Transplantation
Source: PubMed Central journal article supplement — Kidney Int Rep. 2020 Oct 17;6(1):128–37. doi: 10.1016/j.ekir.2020.10.011 (PMC7785410; doi:10.1016/j.ekir.2020.10.011), 2020-10-17
Supplement: mmc1.pdf [file mmc1.pdf]

**Supplementary Table 1: Medication regimen complexity index calculation <sup>11</sup>**

| MRCI component A: form/route |              |        | MRCI component B: dosing frequency |             |        | MRCI component C: special instructions                                                  |        |
|------------------------------|--------------|--------|------------------------------------|-------------|--------|-----------------------------------------------------------------------------------------|--------|
| Dosage Form                  | Route        | Weight | Frequency 1                        | Frequency 2 | Weight | Direction                                                                               | Weight |
| Tablet                       | Oral         | 1.0    | Once a day                         | As needed   | 0.5    | Take/use at specific times                                                              | 1.0    |
| Powders/Granules             | Oral         | 2.0    | Once a day                         |             | 1.0    | Take/use in relation to food                                                            | 1.0    |
| Mouthwashes                  | Oral         | 2.0    | At bedtime                         |             | 1.0    | Multiple units at one time                                                              | 1.0    |
| Spray                        | Topical      | 1.0    | Every other day                    |             | 2.0    | Break or crush tablet                                                                   | 1.0    |
| Gel                          | Topical      | 2.0    | Twice times a day                  |             | 2.0    | Tapering/increasing dose                                                                | 2.0    |
| Patches                      | Topical      | 2.0    | Twice times a day                  | As needed   | 1.0    | Alternating dose (ex: 1 in the morning and 2 in the evening/1 day out of 2 alternately) | 2.0    |
| Spray                        | Nasal        | 2.0    | Three times a day                  |             | 3.0    |                                                                                         |        |
| Drop                         | Oral         | 2.0    | Three times a day                  | As needed   | 1.5    |                                                                                         |        |
| Drop                         | Ophthalmic   | 3.0    | Four times a day                   |             | 4.0    | Dissolve tablet/powder                                                                  | 1.0    |
| Accuhaler                    | Inhalation   | 3.0    | Four times a day                   | As needed   | 2.0    | Take with specific fluid                                                                | 1.0    |
| Ampoule pen                  | Subcutaneous | 3.0    | Every 12 h                         |             | 2.5    |                                                                                         |        |
| Ampoule                      | Subcutaneous | 4.0    | Every 12 h                         | As needed   | 1.5    |                                                                                         |        |
| Suppositories                | Others       | 2.0    | Every 8 h                          |             | 3.5    |                                                                                         |        |
| Vaginal creams               | Others       | 2.0    | Every 8 h                          | As needed   | 2.0    |                                                                                         |        |
|                              |              |        | Every 6 h                          |             | 4.5    |                                                                                         |        |
| <b>EHR application</b>       |              |        | Every 6 h                          | As needed   | 2.5    |                                                                                         |        |
| Liquid                       | Intravenous  | 3.0    | Every 4 h                          |             | 6.5    |                                                                                         |        |
| Implant                      | Subcutaneous | 1.0    | Every 4 h                          | As needed   | 3.5    |                                                                                         |        |
| Dialysate                    |              | 5.0    |                                    |             |        |                                                                                         |        |
|                              |              |        | <b>For EHR application</b>         |             |        |                                                                                         |        |
|                              |              |        | Every 8 h                          | & as needed | 4.0    |                                                                                         |        |
|                              |              |        | Every 6 h                          | & as needed | 5.0    |                                                                                         |        |

**Supplementary Table 2: Medication regimen complexity index examples. A) Patient with the highest MRCI at M12 – B) Patient with the lowest MRCI at M12**

**A) Patient with the highest MRCI at M12**

| Prescription                                                               | Administration route      | Frequency               | Instructions                                                                        | MRCI A    | MRCI B    | MRCI C    |
|----------------------------------------------------------------------------|---------------------------|-------------------------|-------------------------------------------------------------------------------------|-----------|-----------|-----------|
| Acetylsalicylate de lysine – 75 mg at midday                               | Powders/Granules          | Once a day              | Dissolve tablet/powders                                                             | 2         | 1         | 1         |
| Bisoprolol 10 mg – each morning                                            | Tablet oral               | Once a day              | Take/use in relation to food                                                        | 1         | 1         | 1         |
| Chlorure de potassium – 3 times daily                                      | Tablet oral               | Three times a day       |                                                                                     | 1         | 3         | 0         |
| Cholecalciferol – 1 vial per month                                         | Drop oral                 | Every other day         |                                                                                     | 2         | 2         | 0         |
| Ciclosporine – 75 mg each morning, 50 mg each evening                      | Tablet oral               | Twice a day             | Multiple units at one time                                                          | 1         | 2         | 1         |
| Colchimax - ½ tablet daily                                                 | Tablet oral               | Once a day              | Take/use in relation to food                                                        | 1         | 1         | 1         |
| Darbepoetine alfa – 100 µg every 15 days                                   | Ampoule pen /Subcutaneous | Every other day         |                                                                                     | 3         | 2         | 0         |
| Enalapril - 2,5 mg each morning                                            | Tablet oral               | Once a day              | Take/use in relation to food                                                        | 1         | 1         | 1         |
| Esomeprazole 40 mg – 1 day out of 2 alternately                            | Tablet oral               | Every other day         | Alternating dose                                                                    | 1         | 2         | 2         |
| Ezetimibe – 10 mg each evening                                             | Tablet oral               | Once a day              |                                                                                     | 1         | 1         | 0         |
| Febuxostat – 80 mg daily                                                   | Tablet oral               | Once a day              |                                                                                     | 1         | 1         | 0         |
| Furosemide – 80 mg each morning and 40 mg at midday                        | Tablet oral               | Twice a day             | Multiple units at one time                                                          | 1         | 2         | 1         |
| Insuline asparte - 14UI each morning, 12UI at midday and 12UI each evening | Ampoule pen /Subcutaneous | Three times a day       | Take/use in relation to food<br>Alternating dose                                    | 3         | 3         | 3         |
| Insuline glargine - 24 UI each evening                                     | Ampoule pen /Subcutaneous | Once a day              |                                                                                     | 3         | 1         | 0         |
| Lercanidipine - 20 mg each evening                                         | Tablet oral               | Once a day              | Take/use in relation to food<br>Take/use at specific times                          | 1         | 1         | 2         |
| Molsidomine 1 tablet – 3 times daily                                       | Tablet oral               | Three times a day       |                                                                                     | 1         | 3         | 0         |
| Prednisone - 10 mg each morning                                            | Tablet oral               | Once a day              | Take/use in relation to food<br>Take/use at specific times<br>Break or crush tablet | 1         | 1         | 3         |
| Rilmenidine - 1 mg each morning and each evening                           | Tablet oral               | Twice a day             | Take/use in relation to food                                                        | 1         | 2         | 1         |
| Sulfate ferreux/Acide folique – 1 tablet daily                             | Tablet oral               | Once a day              | Take/use in relation to food                                                        | 1         | 1         | 1         |
| Ticagrelor – 90 mg twice daily                                             | Tablet oral               | Twice a day             |                                                                                     | 1         | 2         | 0         |
| Zolpidem - ½ tablet each night                                             | Tablet oral               | Once a day - At bedtime | Break or crush tablet                                                               | 1         | 2         | 1         |
| <b>TOTAL</b>                                                               |                           |                         |                                                                                     | <b>29</b> | <b>35</b> | <b>19</b> |
|                                                                            |                           |                         |                                                                                     | <b>83</b> |           |           |

**B) Patient with the lowest MRCI at M12**

|                                           | <b>Administration route</b> | <b>Frequency</b> | <b>Instructions</b>                                        | <b>MRCI A</b> | <b>MRCI B</b> | <b>MRCI C</b> |
|-------------------------------------------|-----------------------------|------------------|------------------------------------------------------------|---------------|---------------|---------------|
| Acide folique – 5 mg daily – each morning | Tablet oral                 | Once a day       |                                                            | 1             | 1             | 0             |
| Azathioprine – 75 mg daily                | Tablet oral                 | Once a day       | Take/use in relation to food<br>Multiple units at one time | 1             | 1             | 2             |
| Tacrolimus – 13 mg daily                  | Tablet oral                 | Twice a day      | Take/use in relation to food<br>Multiple units at one time | 1             | 2             | 2             |
| <b>TOTAL</b>                              |                             |                  |                                                            | <b>3</b>      | <b>4</b>      | <b>4</b>      |
|                                           |                             |                  |                                                            | <b>11</b>     |               |               |
